# Supplementary material for: Caution regarding the specificities of pan-cancer microbial structure
Source: PubMed Central journal article supplement (PMC10483429; doi:10.1099/mgen.0.001088), 2023-08-09
Supplement: mgen-9-1088-s001.pdf [file mgen-9-1088-s001.pdf]

Supplementary Table 1 - These species were found on GTDB taxonomy and include species representatives that passed quality checks. Each of these species originates from a genus that was the top performing microbial feature in the one-vs-all tumour models provided by Poore *et al.* [1] and was considered the most stringent approach to decontamination.

| GTDB Taxonomy                | Isolation Source Information                                                                                                                                                                                                                                                                                                                                                            |
|------------------------------|-----------------------------------------------------------------------------------------------------------------------------------------------------------------------------------------------------------------------------------------------------------------------------------------------------------------------------------------------------------------------------------------|
| Leucothrix sp002747455       | swab sample of gingival sulcus (mouth) from 29 year old lactating female Dolphin_Z<br><a href="https://www.ncbi.nlm.nih.gov/biosample/SAMN07757601/">https://www.ncbi.nlm.nih.gov/biosample/SAMN07757601/</a>                                                                                                                                                                           |
| Leucothrix mucor             | seaweed, Friday Harbor, WA<br><a href="https://www.ncbi.nlm.nih.gov/biosample/SAMN02440559/">https://www.ncbi.nlm.nih.gov/biosample/SAMN02440559/</a>                                                                                                                                                                                                                                   |
| Leucothrix pacifica          | Seawater - Pacific Ocean: South Pacific Gyre<br><a href="https://www.ncbi.nlm.nih.gov/biosample/SAMN09228920/">https://www.ncbi.nlm.nih.gov/biosample/SAMN09228920/</a>                                                                                                                                                                                                                 |
| Leucothrix arctica           | Seawater - Svalbard: coast of Kongsfjorden, Arctic<br><a href="https://www.ncbi.nlm.nih.gov/biosample/SAMN09228919/">https://www.ncbi.nlm.nih.gov/biosample/SAMN09228919/</a>                                                                                                                                                                                                           |
| Thalassomonas actiniarum     | Sea anemone<br><br><a href="https://www.ncbi.nlm.nih.gov/biosample/SAMN03278135/">https://www.ncbi.nlm.nih.gov/biosample/SAMN03278135/</a>                                                                                                                                                                                                                                              |
| Thalassomonas viridans       | Cultivated oysters<br><a href="https://www.ncbi.nlm.nih.gov/biosample/SAMN03278134/">https://www.ncbi.nlm.nih.gov/biosample/SAMN03278134/</a>                                                                                                                                                                                                                                           |
| Ignicoccus_A sp013154085     | deepsea hydrothermal sulfide chimney<br><a href="https://www.ncbi.nlm.nih.gov/biosample/SAMN12405658/">https://www.ncbi.nlm.nih.gov/biosample/SAMN12405658/</a>                                                                                                                                                                                                                         |
| Ignicoccus_A sp015521275     | marine hydrothermal vent biome<br><a href="https://www.ncbi.nlm.nih.gov/biosample/SAMN12837294/">https://www.ncbi.nlm.nih.gov/biosample/SAMN12837294/</a>                                                                                                                                                                                                                               |
| Ignicoccus_A hospitalis      | <b><i>Ignicoccus hospitalis</i> Kin4/I</b> . <i>Ignicoccus hospitalis</i> Kin4/I was isolated from gravel obtained from the shallow marine hydrothermal system of the Kolbeinsey Ridge, north of Iceland and will be used for comparative analysis with other thermophiles<br><a href="https://www.ncbi.nlm.nih.gov/bioproject/13914">https://www.ncbi.nlm.nih.gov/bioproject/13914</a> |
| Ignicoccus islandicus        | “The genome sequence of this strain will provide information on the adaptation to high temperature environments and be used for evolutionary and comparative genomic analysis.”<br><a href="https://www.ncbi.nlm.nih.gov/bioproject/PRJNA61347/">https://www.ncbi.nlm.nih.gov/bioproject/PRJNA61347/</a>                                                                                |
| Salinimicrobium xinjiangense | Soil sediment of a salt lake<br><a href="https://www.ncbi.nlm.nih.gov/biosample/SAMN02440840/">https://www.ncbi.nlm.nih.gov/biosample/SAMN02440840/</a>                                                                                                                                                                                                                                 |
| Salinimicrobium terrae       | Saline soil<br><a href="https://www.ncbi.nlm.nih.gov/biosample/SAMN02440676/">https://www.ncbi.nlm.nih.gov/biosample/SAMN02440676/</a>                                                                                                                                                                                                                                                  |
| Salinimicrobium sp012038135  | marine sediment<br><br><a href="https://www.ncbi.nlm.nih.gov/biosample/SAMN14480397/">https://www.ncbi.nlm.nih.gov/biosample/SAMN14480397/</a>                                                                                                                                                                                                                                          |
| Salinimicrobium marinum      | Unstated <a href="https://www.ncbi.nlm.nih.gov/biosample/SAMD00245570/">https://www.ncbi.nlm.nih.gov/biosample/SAMD00245570/</a>                                                                                                                                                                                                                                                        |
| Salinimicrobium catena       | Unstated <a href="https://www.ncbi.nlm.nih.gov/biosample/SAMN04488140/">https://www.ncbi.nlm.nih.gov/biosample/SAMN04488140/</a>                                                                                                                                                                                                                                                        |
| Salinimicrobium sediminis    | Unstated <a href="https://www.ncbi.nlm.nih.gov/biosample/SAMN06296241/">https://www.ncbi.nlm.nih.gov/biosample/SAMN06296241/</a>                                                                                                                                                                                                                                                        |

Supplementary Table 2 – Viruses as top features in one-vs-all models. These were identified by searching NCBI at genus level and investigating each individual species. Each of these species originates from a genus that was the top performing feature in one of the one-vs-all tumour models presented by Poore *et al.* under the most stringent decontamination conditions.

|                                                                                            |                                                                                                                                                                                                                                                                                        |
|--------------------------------------------------------------------------------------------|----------------------------------------------------------------------------------------------------------------------------------------------------------------------------------------------------------------------------------------------------------------------------------------|
| <u><i>Areca palm velarivirus 1</i></u>                                                     | Complete genome sequence of a novel Velarivirus infecting areca palm in China<br><a href="https://www.ncbi.nlm.nih.gov/nuccore/NC_027121.1/">https://www.ncbi.nlm.nih.gov/nuccore/NC_027121.1/</a>                                                                                     |
| <u><i>Cordyline virus 1</i></u> (velarivirus)                                              | An assemblage of closteroviruses infects Hawaiian ti ( <i>Cordyline fruticosa</i> L.) <a href="https://www.ncbi.nlm.nih.gov/nuccore/NC_038421.1/">https://www.ncbi.nlm.nih.gov/nuccore/NC_038421.1/</a>                                                                                |
| <u><i>Cordyline virus 2</i></u> (velarivirus)                                              | Differentiation, distribution, and elimination of closteroviruses infecting <i>Cordyline fruticosa</i> (L.) in Hawaii<br><a href="https://www.ncbi.nlm.nih.gov/nuccore/NC_043453.1/">https://www.ncbi.nlm.nih.gov/nuccore/NC_043453.1/</a>                                             |
| <u><i>Cordyline virus 3</i></u> (velarivirus)                                              | Differentiation, distribution, and elimination of closteroviruses infecting <i>Cordyline fruticosa</i> (L.) in Hawaii<br><a href="https://www.ncbi.nlm.nih.gov/nuccore/NC_043107.1/">https://www.ncbi.nlm.nih.gov/nuccore/NC_043107.1/</a>                                             |
| <u><i>Cordyline virus 4</i></u> (velarivirus)                                              | Differentiation, distribution, and elimination of closteroviruses infecting <i>Cordyline fruticosa</i> (L.) in Hawaii<br><a href="https://www.ncbi.nlm.nih.gov/nuccore/NC_043108.1/">https://www.ncbi.nlm.nih.gov/nuccore/NC_043108.1/</a>                                             |
| <u><i>Grapevine leafroll-associated virus 7</i></u> (velarivirus)                          | Molecular characterization and taxonomy of grapevine leafroll-associated virus 7<br><a href="https://www.ncbi.nlm.nih.gov/nuccore/NC_016436.1/">https://www.ncbi.nlm.nih.gov/nuccore/NC_016436.1/</a>                                                                                  |
| <u><i>Little cherry virus 1</i></u><br><u><i>Malus domestica virus A</i></u> (velarivirus) | Complete genome structure and phylogenetic analysis of little cherry virus, a mealybug-transmissible closterovirus<br><a href="https://www.ncbi.nlm.nih.gov/nuccore/NC_001836.1/">https://www.ncbi.nlm.nih.gov/nuccore/NC_001836.1/</a>                                                |
| <u><i>Malus domestica virus A</i></u> (velarivirus)                                        | Genomic characterization of a novel velarivirus <i>Malus domestica virus A</i> (MdoVA) infecting apple<br><a href="https://www.ncbi.nlm.nih.gov/nuccore/NC_055599.1/">https://www.ncbi.nlm.nih.gov/nuccore/NC_055599.1/</a>                                                            |
| <u><i>Brome streak mosaic virus</i></u> ( <b><i>Tritimovirus</i></b> )                     | The complete nucleotide sequence and genome organization of the mite-transmitted brome streak mosaic rymovirus in comparison with those of potyviruses<br><a href="https://www.ncbi.nlm.nih.gov/nuccore/NC_003501.1/">https://www.ncbi.nlm.nih.gov/nuccore/NC_003501.1/</a>            |
| <u><i>Oat necrotic mottle virus</i></u> ( <b><i>Tritimovirus</i></b> )                     | Complete nucleotide sequence of Oat necrotic mottle virus: a distinct Tritimovirus species (family Potyviridae) most closely related to Wheat streak mosaic virus<br><a href="https://www.ncbi.nlm.nih.gov/nuccore/NC_005136.1/">https://www.ncbi.nlm.nih.gov/nuccore/NC_005136.1/</a> |
| <u><i>Tall oatgrass mosaic virus</i></u> ( <b><i>Tritimovirus</i></b> )                    | Tall oatgrass mosaic virus (TOgMV): a novel member of the genus Tritimovirus infecting <i>Arrhenatherum elatius</i><br><a href="https://www.ncbi.nlm.nih.gov/nuccore/NC_022745.1/">https://www.ncbi.nlm.nih.gov/nuccore/NC_022745.1/</a>                                               |
| <u><i>Wheat eglid mosaic virus</i></u> ( <b><i>Tritimovirus</i></b> )                      | Analyses of the complete sequence of the genome of wheat Eglid mosaic virus, a novel species in the genus Tritimovirus<br><a href="https://www.ncbi.nlm.nih.gov/nuccore/NC_009805.1/">https://www.ncbi.nlm.nih.gov/nuccore/NC_009805.1/</a>                                            |
| <u><i>Wheat streak mosaic virus</i></u> ( <b><i>Tritimovirus</i></b> )                     | Phylogenetic relationships within the family potyviridae: wheat streak mosaic virus and brome streak mosaic virus are not members of the genus rymovirus<br><a href="https://www.ncbi.nlm.nih.gov/nuccore/NC_001886.1/">https://www.ncbi.nlm.nih.gov/nuccore/NC_001886.1/</a>          |
| <u><i>Yellow oat grass mosaic virus</i></u> ( <b><i>Tritimovirus</i></b> )                 | Genome sequence of two isolates of Yellow oatgrass mosaic virus, a new grass-infecting Tritimovirus<br><a href="https://www.ncbi.nlm.nih.gov/nuccore/NC_024471.1/">https://www.ncbi.nlm.nih.gov/nuccore/NC_024471.1/</a>                                                               |
| <u><i>Aedes pseudoscutellaris reovirus</i></u> (Dinovernavirus)                            | isolated from <i>Aedes pseudoscutellaris</i> mosquito cells<br><a href="https://www.ncbi.nlm.nih.gov/nuccore/NC_007666.1/">https://www.ncbi.nlm.nih.gov/nuccore/NC_007666.1/</a><br>10.1016/j.virol.2005.08.028                                                                        |

|                                                                                   |                                                                                                                                                                                                                                                                                |
|-----------------------------------------------------------------------------------|--------------------------------------------------------------------------------------------------------------------------------------------------------------------------------------------------------------------------------------------------------------------------------|
| <u><i>Chaetoceros socialis forma radians RNA virus 1</i></u><br>(Bacillarnavirus) | Isolation and characterization of a single-stranded RNA virus infecting the bloom-forming diatom <i>Chaetoceros socialis</i><br><a href="https://www.ncbi.nlm.nih.gov/nucleotide/NC_012212.1/">https://www.ncbi.nlm.nih.gov/nucleotide/NC_012212.1/</a>                        |
| <u><i>Chaetoceros tenuissimus RNA virus O1</i></u><br>(Bacillarnavirus)           | Isolation and characterization of a single-stranded RNA virus infecting the marine planktonic diatom <i>Chaetoceros tenuissimus</i> Meunier<br><a href="https://www.ncbi.nlm.nih.gov/nucleotide/NC_038321.1/">https://www.ncbi.nlm.nih.gov/nucleotide/NC_038321.1/</a>         |
| <u><i>Rhizosolenia setigera RNA virus O1</i></u><br>(Bacillarnavirus)             | Complete nucleotide sequence of a single-stranded RNA virus infecting the bloom-forming diatom <i>Rhizosolenia setigera</i><br><a href="https://www.ncbi.nlm.nih.gov/nucleotide/NC_018613.1/">https://www.ncbi.nlm.nih.gov/nucleotide/NC_018613.1/</a>                         |
| <u><i>Agropyron mosaic virus</i></u><br>(Rymovirus)                               | Functional replacement of Wheat streak mosaic virus HC-Pro with the corresponding cistron from a diverse array of viruses in the family<br><a href="https://www.ncbi.nlm.nih.gov/nucleotide/NC_005903.1/">https://www.ncbi.nlm.nih.gov/nucleotide/NC_005903.1/</a>             |
| <u><i>Hordeum mosaic virus</i></u><br>(Rymovirus)                                 | Functional replacement of Wheat streak mosaic virus HC-Pro with the corresponding cistron from a diverse array of viruses in the family Potyviridae<br><a href="https://www.ncbi.nlm.nih.gov/nucleotide/NC_005904.1/">https://www.ncbi.nlm.nih.gov/nucleotide/NC_005904.1/</a> |
| <u><i>Ryegrass mosaic virus</i></u><br>(Rymovirus)                                | The complete nucleotide sequence of the Ryegrass mosaic virus<br><a href="https://www.ncbi.nlm.nih.gov/nucleotide/NC_001814.1/">https://www.ncbi.nlm.nih.gov/nucleotide/NC_001814.1/</a>                                                                                       |

Supplementary Table 3 – The proportion (and total number) of all primary tumour samples across sequencing centers as provided by Poore et al. in file: Metadata-TCGA-All-18116-Samples.csv. Any cells where at least 90% of the samples originate from one sequencing center are highlighted in red.

| Primary Tumour Type          | Sequencing Center          |                                    |                                               |                        |                                                    |                                               |                              |                                          |   |
|------------------------------|----------------------------|------------------------------------|-----------------------------------------------|------------------------|----------------------------------------------------|-----------------------------------------------|------------------------------|------------------------------------------|---|
|                              | Baylor College of Medicine | Broad Institute of MIT and Harvard | Canada's Michael Smith Genome Sciences Centre | Harvard Medical School | MD Anderson - Institute for Applied Cancer Science | MD Anderson - RPPA Core Facility (Proteomics) | University of North Carolina | Washington University School of Medicine |   |
| Adrenocortical Carcinoma     | 0                          | 0                                  | 0                                             | 0                      | 0                                                  | 0                                             | 1 (76)                       | 0                                        | 0 |
| Bladder Urothelial Carcinoma | 0                          | 0.05 (27)                          | 0                                             | 0.09 (50)              | 0.11 (60)                                          | 0                                             | 0.75 (406)                   | 0                                        | 0 |
| Brain Lower Grade Glioma     | 0                          | 0.05 (30)                          | 0                                             | 0.09 (51)              | 0                                                  | 0                                             | 0.86 (505)                   | 0                                        | 0 |
| Breast Invasive Carcinoma    | 0                          | 0                                  | 0                                             | 0.02 (18)              | 0 (1)                                              | 0                                             | 0.92 (1046)                  | 0.07 (78)                                | 0 |
| Cervical and Endocervical    | 0                          | 0                                  | 0                                             | 0.02 (6)               | 0.11 (41)                                          | 0                                             | 0.82 (293)                   | 0.05 (18)                                | 0 |

|                                       |           |            |            |            |           |   |            |           |
|---------------------------------------|-----------|------------|------------|------------|-----------|---|------------|-----------|
| Cholangiocarcinoma                    | 0         | 0          | 0          | 0          | 0         | 0 | 1 (36)     | 0         |
| Colon Adenocarcinoma                  | 0.05 (40) | 0          | 0          | 0.11 (86)  | 0         | 0 | 0.84 (651) | 0         |
| Esophageal Carcinoma                  | 0         | 0          | 0.69 (147) | 0          | 0.24 (50) | 0 | 0          | 0.07 (15) |
| Glioblastoma Multiforme               | 0         | 0.95 (304) | 0          | 0          | 0         | 0 | 0          | 0.05 (17) |
| Head and Neck Squamous Cell Carcinoma | 0.04 (25) | 0.04 (25)  | 0          | 0.12 (81)  | 0.03 (21) | 0 | 0.77 (512) | 0         |
| Kidney Chromophobe                    | 0.32 (30) | 0          | 0          | 0          | 0         | 0 | 0.68 (65)  | 0         |
| Kidney Renal Clear Cell Carcinoma     | 0.03 (27) | 0 (3)      | 0          | 0          | 0         | 0 | 0.97 (929) | 0         |
| Kidney Renal Papillary Cell Carcinoma | 0.09 (26) | 0          | 0          | 0          | 0         | 0 | 0.91 (277) | 0         |
| Liver Hepatocellular Carcinoma        | 0.1 (39)  | 0          | 0          | 0          | 0         | 0 | 0.9 (357)  | 0         |
| Lung Adenocarcinoma                   | 0         | 0.04 (23)  | 0          | 0.17 (108) | 0         | 0 | 0.79 (503) | 0         |
| Lung Squamous Cell Carcinoma          | 0         | 0.06 (29)  | 0          | 0          | 0         | 0 | 0.94 (480) | 0         |
| Diffuse Large B-cell Lymphoma         | 0.1 (5)   | 0          | 0          | 0          | 0         | 0 | 0.9 (45)   | 0         |
| Mesothelioma                          | 0         | 0          | 0          | 0          | 0         | 0 | 1 (82)     | 0         |
| Ovarian Serous Cystadenocarcinoma     | 0.04 (33) | 0.02 (14)  | 0.93 (712) | 0          | 0         | 0 | 0          | 0.01 (9)  |
| Pancreatic Adenocarcinoma             | 0         | 0          | 0          | 0          | 0         | 0 | 1 (172)    | 0         |
| Pheochromocytoma and Paranglioma      | 0         | 0          | 0          | 0          | 0         | 0 | 1 (174)    | 0         |
| Prostate Adenocarcinoma               | 0         | 0.02 (14)  | 0          | 0.18 (108) | 0         | 0 | 0.8 (493)  | 0         |
| Rectum Adenocarcinoma                 | 0.06 (18) | 0          | 0          | 0.14 (42)  | 0         | 0 | 0.79 (231) | 0         |

|                                             |   |           |           |            |           |   |            |           |
|---------------------------------------------|---|-----------|-----------|------------|-----------|---|------------|-----------|
| <b>Sarcoma</b>                              | 0 | 0         | 0         | 0          | 0         | 0 | 0.89 (250) | 0.11 (30) |
| <b>Skin Cutaneous Melanoma</b>              | 0 | 0.01 (1)  | 0         | 0.12 (14)  | 0         | 0 | 0.87 (102) | 0         |
| <b>Stomach Adenocarcinoma</b>               | 0 | 0.04 (28) | 0.8 (573) | 0.15 (110) | 0.01 (5)  | 0 | 0          | 0         |
| <b>Testicular Germ Cell Tumors</b>          | 0 | 0         | 0         | 0          | 0         | 0 | 1 (133)    | 0         |
| <b>Thymoma</b>                              | 0 | 0         | 0         | 0          | 0         | 0 | 1 (119)    | 0         |
| <b>Thyroid Carcinoma</b>                    | 0 | 0.05 (28) | 0         | 0.11 (71)  | 0.04 (23) | 0 | 0.8 (496)  | 0         |
| <b>Uterine Carcinosarcoma</b>               | 0 | 0         | 0         | 0          | 0         | 0 | 1 (57)     | 0         |
| <b>Uterine Corpus Endometrial Carcinoma</b> | 0 | 0         | 0         | 0.12 (106) | 0         | 0 | 0.83 (723) | 0.04 (39) |
| <b>Uveal Melanoma</b>                       | 0 | 0         | 0         | 0          | 0.4 (51)  | 0 | 0.6 (76)   | 0         |

[1] Poore GD, Kopylova E, Zhu Q, Carpenter C, Fraraccio S, Wandro S, et al. Microbiome analyses of blood and tissues suggest cancer diagnostic approach. Nature. 2020;579:567-74.
